# Supplementary material for: Neurons Self-Organize Around Salivary Epithelial Cells in Novel Co-Culture Model
Source: PubMed Central journal article supplement (PMC5100677; doi:10.15436/2471-0598.16.013), 2016-05-27
Supplement: NIHMS797168-supplement-01.pdf [file NIHMS797168-supplement-01.pdf]

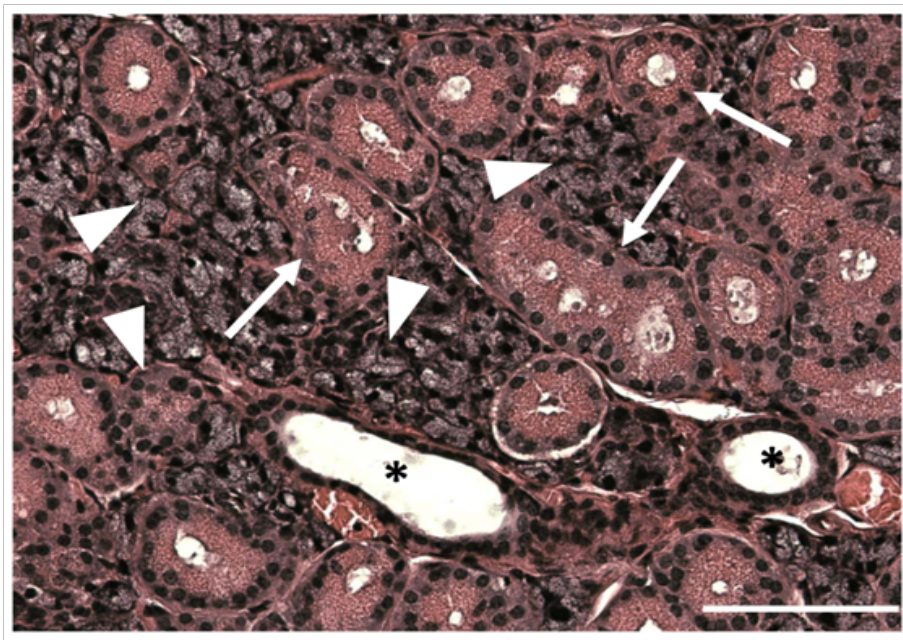

**Supplementary Figure 1: Native salivary gland tissue displays acinar and ductal organization**

H&E staining of mouse SMG reveals organized salivary epithelial structures, including acini (triangles), striated ducts (arrows), and excretory ducts (asterisks). Scale bar is 100  $\mu$ m
